# Supplementary material for: Naltrexone-Bupropion and Behavior Therapy, Alone and Combined, for Binge-Eating Disorder: Randomized Double-Blind Placebo-Controlled Trial
Source: Atypon-hosted journal article supplement (doi:10.1176/appi.ajp.20220267), 2022-10-26
Supplement: appi.ajp.20220267.ds001.pdf [file appi.ajp.20220267.ds001.pdf]

Data supplement for Grilo et al., Naltrexone-Bupropion Combination and Behavior Therapy, Alone and Combined, for Binge-Eating Disorder: Randomized Double-Blind Placebo-Controlled Trial. *Am J Psychiatry* (doi: 10.1176/appi.ajp.20220267)

**TABLE S1.** Mixed model findings for primary outcomes

|              | Binge Eating Frequency<br>(EDE Interview) | Binge Eating Frequency<br>(EDE Questionnaire) | Percent Weight Loss      |
|--------------|-------------------------------------------|-----------------------------------------------|--------------------------|
| BWL          | F(1,121)=5.86, p=0.02                     | F(1,163)=9.59, p=0.002                        | F(1,126)=12.78, p=0.0005 |
| MED          | F(1,121)=3.67, p=0.06                     | F(1,163)=6.11, p=0.02                         | F(1,126)=7.74, p=0.006   |
| BWL*MED      | F(1,121)=0.09, p=0.77                     | F(1,163)=0.14, p=0.71                         | F(1,126)=4.25, p=0.04    |
| time         | F(1,111)=239.39, p<0.0001                 | F(4,407)=92.84, p<0.0001                      | F(3,111)=12.56, p<0.0001 |
| BWL*time     | F(1,111)=24.34, p<0.0001                  | F(4,407)=5.99, p<0.0001                       | F(3,111)=10.70, p<0.0001 |
| MED*time     | F(1,111)=0.30, p=0.58                     | F(4,407)=2.57, p=0.04                         | F(3,111)=0.58, p=0.63    |
| BWL*MED*time | F(1,111)=0.03, p=0.87                     | F(4,407)=1.08, p=0.37                         | F(3,111)=1.18, p=0.32    |

Note: The Eating Disorder Examination (EDE) interview was administered at the pretreatment and posttreatment assessments, and the Eating Disorder Examination Questionnaire was administered at the pretreatment, monthly, and posttreatment assessments. BWL=behavioral weight loss versus no behavioral weight loss; MED=naltrexone/bupropion versus placebo; time=assessment timepoints.
